# Supplementary material for: Phase I open-label trial of intraperitoneal paclitaxel in combination with intravenous cisplatin and oral capecitabine in patients with advanced gastric cancer and peritoneal metastases (IPGP study): study protocol
Source: PubMed Central journal article supplement — BMJ Open. 2019 May 5;9(5):e026732. doi: 10.1136/bmjopen-2018-026732 (PMC6501970; doi:10.1136/bmjopen-2018-026732), 2019-05-05
Supplement: bmjopen-2018-026732supp002.pdf [file bmjopen-2018-026732supp002.pdf]

## Supplementary File 2

### Specific dose modifications for cisplatin and capecitabine

#### Haematological toxicity

| <b>ANC x 10<sup>9</sup>/L (on day of chemotherapy)</b>         |                                                                                                              |
|----------------------------------------------------------------|--------------------------------------------------------------------------------------------------------------|
| 0.5 to less than 1.5                                           | Delay treatment until recovery                                                                               |
| less than 0.5                                                  | Delay treatment until recovery and consider reducing cisplatin and capecitabine by 25% for subsequent cycles |
| Febrile neutropenia                                            | Delay treatment until recovery and consider reducing cisplatin and capecitabine by 25% for subsequent cycles |
| <b>Platelets x10<sup>9</sup>/L (at any stage of the cycle)</b> |                                                                                                              |
| 50 to less than 100                                            | Delay treatment until recovery                                                                               |
| less than 50                                                   | Delay treatment until recovery and consider reducing cisplatin and capecitabine by 25% for subsequent cycles |

#### Renal impairment

| <b>eGFR (Cockcroft Gault) (mL/min)*</b> |                                                 |
|-----------------------------------------|-------------------------------------------------|
| greater than or equal to 70             | No dose modifications necessary                 |
| 50 to less than 70                      | Reduce cisplatin by 25%                         |
| 30 to less than 50                      | Reduce capecitabine by 25% and cisplatin by 50% |
| less than 30                            | Withhold treatment                              |

#### Hepatic impairment

| <b>Hepatic dysfunction</b>                         |                                                            |
|----------------------------------------------------|------------------------------------------------------------|
| Mild                                               | No dose modifications necessary                            |
| Moderate                                           | Reduce capecitabine by 25%                                 |
| Severe                                             | Reduce capecitabine by 50%                                 |
| Treatment related Grade 3 or 4 Hyperbilirubinaemia | Delay treatment until toxicity resolves to Grade 2 or less |

## Peripheral neuropathy

| CTC grading                 |                |
|-----------------------------|----------------|
| Grade 2, Grade 3 or Grade 4 | Omit cisplatin |

## Mucositis & stomatitis

| CTC grading        |                                                                                                                                                                                                                                                                                                                                                                                     |
|--------------------|-------------------------------------------------------------------------------------------------------------------------------------------------------------------------------------------------------------------------------------------------------------------------------------------------------------------------------------------------------------------------------------|
| Grade 2            | Delay treatment until toxicity has resolved to Grade 1 or less and reduce the dose for subsequent cycles as follow:<br>1 <sup>st</sup> occurrence: No dose reduction<br>2 <sup>nd</sup> occurrence: Reduce cisplatin and capecitabine by 25%<br>3 <sup>rd</sup> occurrence: Reduce cisplatin and capecitabine by 50%<br>4 <sup>th</sup> occurrence: Omit cisplatin and capecitabine |
| Grade 3 or Grade 4 | Delay treatment until toxicity has resolved to Grade 1 or less and reduce the dose for subsequent cycles as follow:<br>1 <sup>st</sup> occurrence: Reduce cisplatin and capecitabine by 50%<br>2 <sup>nd</sup> occurrence: Omit cisplatin and capecitabine                                                                                                                          |

## Diarrhoea

| CTC grading        |                                                                                                                                                                                                                                                                                                                                        |
|--------------------|----------------------------------------------------------------------------------------------------------------------------------------------------------------------------------------------------------------------------------------------------------------------------------------------------------------------------------------|
| Grade 2            | Delay treatment until toxicity has resolved to Grade 1 or less and reduce the dose for subsequent cycles as follow:<br>1 <sup>st</sup> occurrence: No dose reduction<br>2 <sup>nd</sup> occurrence: Reduce capecitabine 25%<br>3 <sup>rd</sup> occurrence: Reduce capecitabine by 50%<br>4 <sup>th</sup> occurrence: Omit capecitabine |
| Grade 3 or Grade 4 | Delay treatment until toxicity has resolved to Grade 1 or less and reduce the dose for subsequent cycles as follow:<br>1 <sup>st</sup> occurrence: Reduce capecitabine by 50%<br>2 <sup>nd</sup> occurrence: Omit capecitabine                                                                                                         |

## Hand and foot syndrome (Palmar-plantar erythrodysesthesia syndrome)

| CTC grading |                                                                                                                                                                      |
|-------------|----------------------------------------------------------------------------------------------------------------------------------------------------------------------|
| Grade 2     | Delay treatment until toxicity has resolved to Grade 1 or less and reduce the dose for subsequent cycles as follow:<br>1 <sup>st</sup> occurrence: No dose reduction |

|         |                                                                                                                                                                                                                                |
|---------|--------------------------------------------------------------------------------------------------------------------------------------------------------------------------------------------------------------------------------|
|         | 2 <sup>nd</sup> occurrence: Reduce capecitabine 25%<br>3 <sup>rd</sup> occurrence: Reduce capecitabine by 50%<br>4 <sup>th</sup> occurrence: Omit capecitabine                                                                 |
| Grade 3 | Delay treatment until toxicity has resolved to Grade 1 or less and reduce the dose for subsequent cycles as follow:<br>1 <sup>st</sup> occurrence: Reduce capecitabine by 50%<br>2 <sup>nd</sup> occurrence: Omit capecitabine |
